# Supplementary material
Source: PubMed Central journal article supplement (PMC6298236)
Supplement: ddy322_supp.pdf [file ddy322_supp.pdf]

## Supplemental Figure 1

**a**

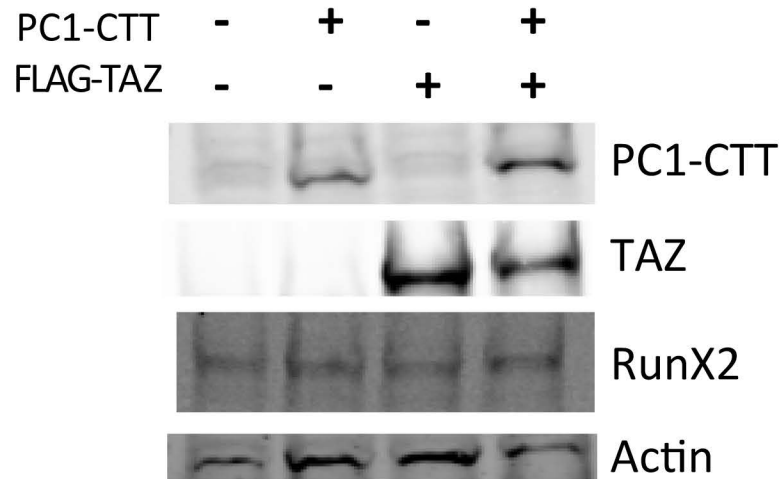

**b**

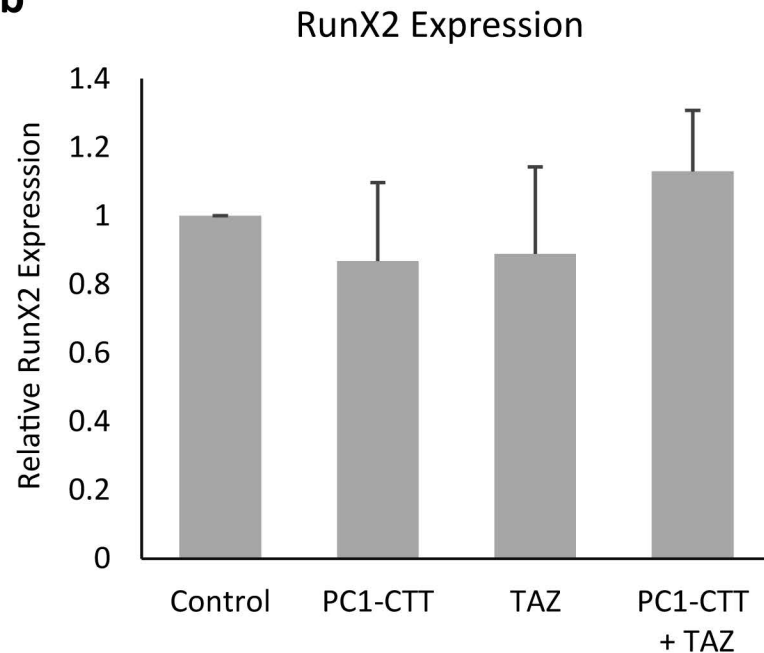

# RunX2-Luciferase

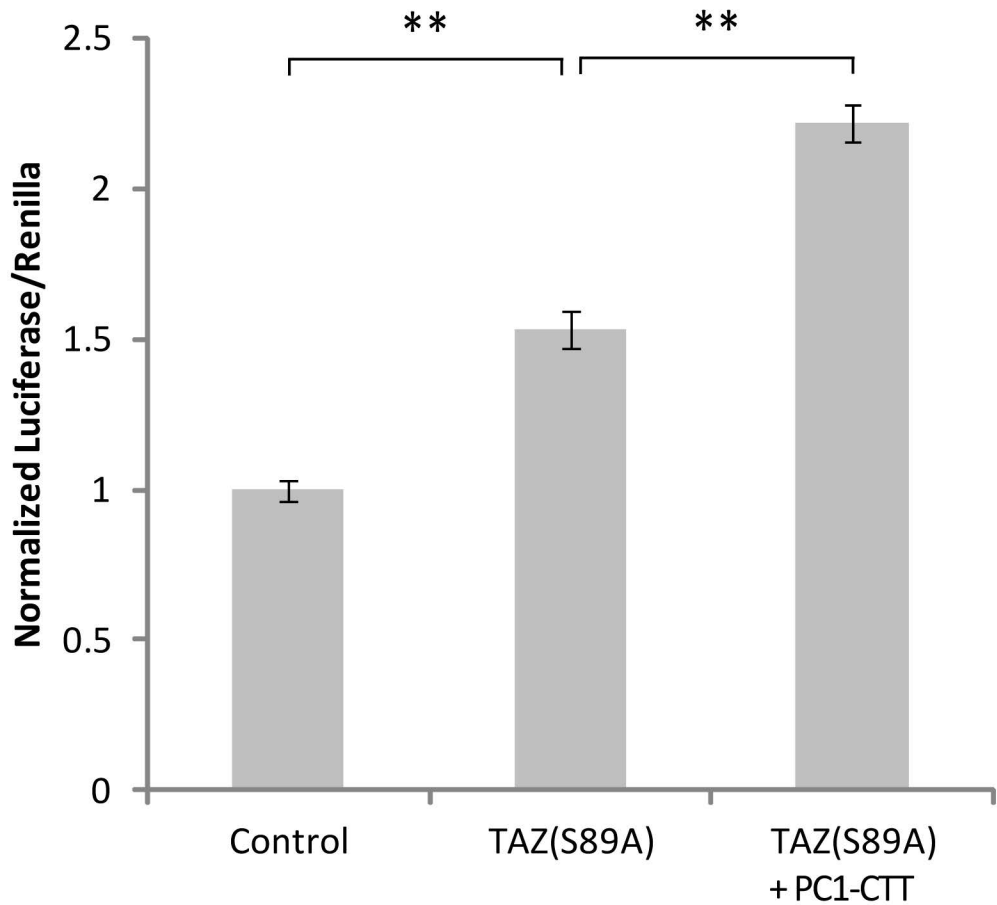

## Supplemental Figure 3

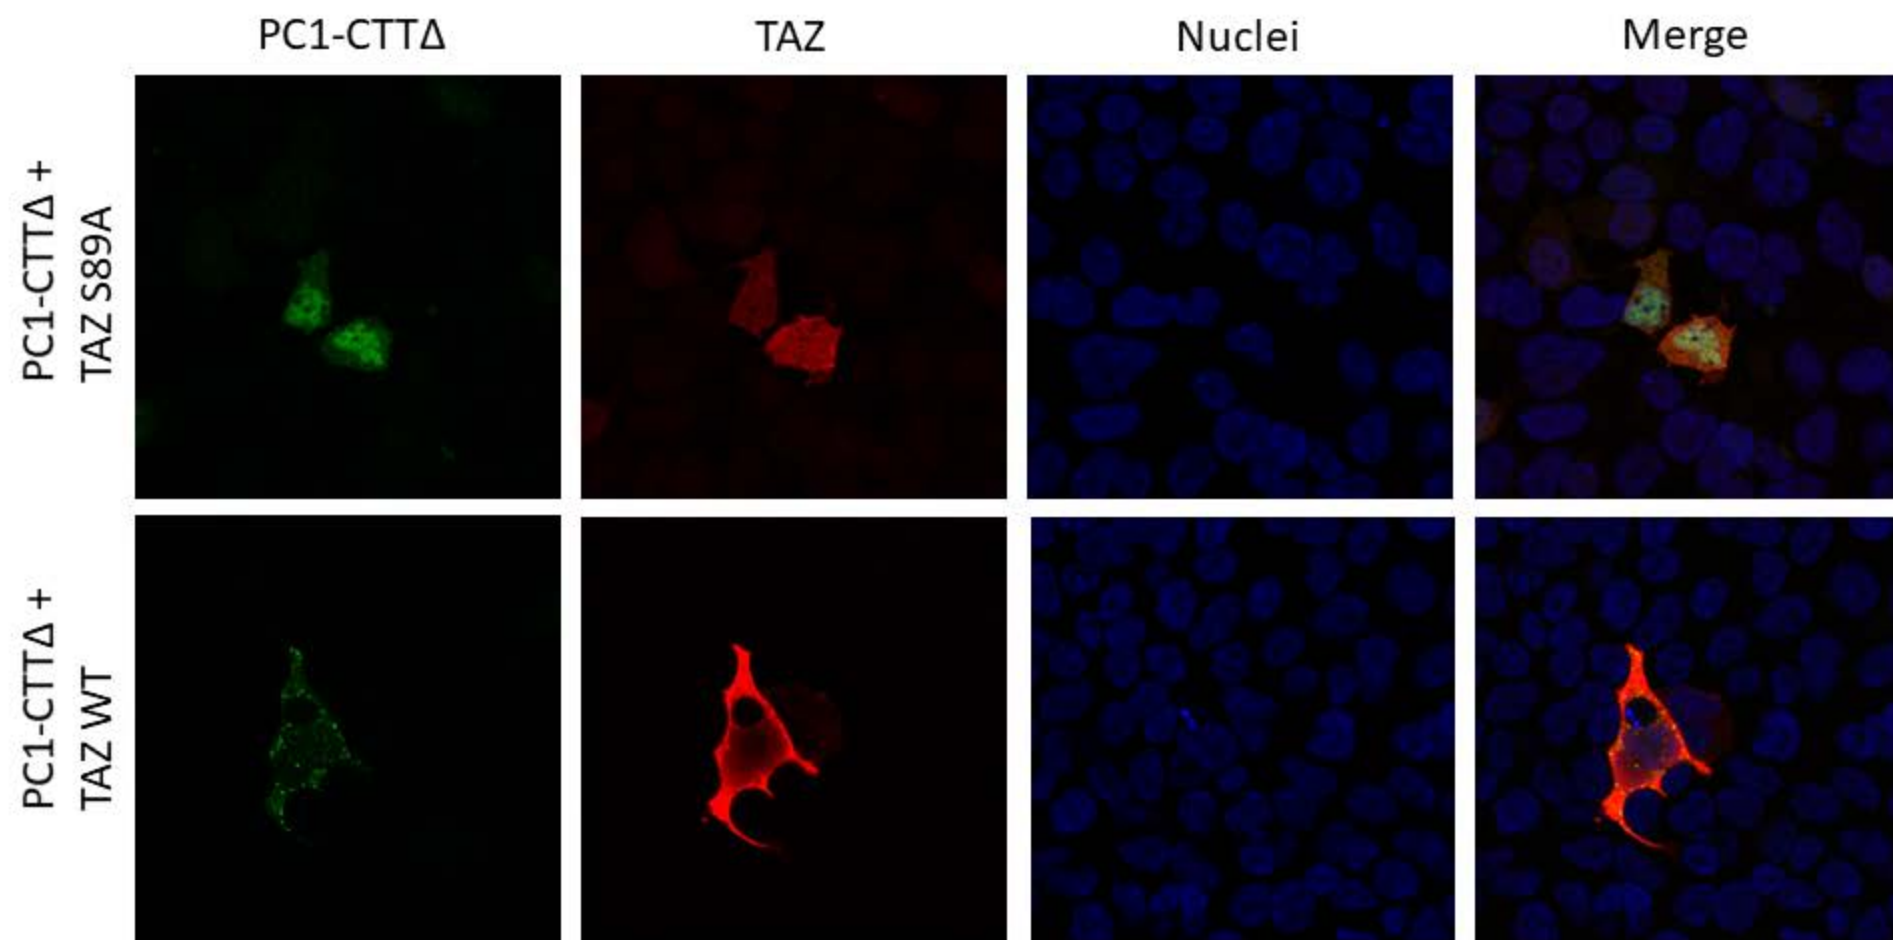

## Supplemental Table 1

| Symbol         | PC1-CTTΔNLS (Negative Control) | PC1-CTT | Fold Stimulation (PC1-CTT vs PC1-CTTΔNLS) | Species | Annotation                                      |
|----------------|--------------------------------|---------|-------------------------------------------|---------|-------------------------------------------------|
| <b>Wwtr1</b>   | 1.099                          | 40.292  | <b>36.668</b>                             | Mm      | RIKEN cDNA 2310058J06 gene                      |
| <b>Bclaf1</b>  | 4.205                          | 81.332  | <b>19.343</b>                             | Mm      | RIKEN cDNA 2700025J07 gene                      |
| <b>Pxn</b>     | 1.202                          | 15.787  | <b>13.133</b>                             | Mm      | Clone                                           |
| <b>Ssbp4</b>   | 1.394                          | 9.339   | <b>6.700</b>                              | Mm      | RIKEN cDNA 1210002E11 gene                      |
| <b>E2f4</b>    | 1.228                          | 7.924   | <b>6.455</b>                              | Mm      | E2F transcription factor 4                      |
| <b>Ssbp2</b>   | 1.280                          | 7.282   | <b>5.690</b>                              | Mm      | Single-stranded DNA binding protein 2           |
| <b>NFIA</b>    | 1.748                          | 8.360   | <b>4.783</b>                              | Hs      | Nuclear Factor IA, clone MGC:22317              |
| <b>TBPL1</b>   | 0.257                          | 0.814   | <b>3.165</b>                              | Hs      | TBP-like 1, clone MGC:8389                      |
| <b>Ifi202b</b> | 1.233                          | 3.420   | <b>2.775</b>                              | Mm      | Interferon activated gene 202B                  |
| <b>Hnf4a</b>   | 2.393                          | 5.827   | <b>2.435</b>                              | Mm      | Hepatic nuclear factor 4 (alpha TF4)            |
| <b>Cnr2</b>    | 5.610                          | 12.396  | <b>2.210</b>                              | Mm      | Cannabinoid receptor 2 (macrophage)             |
| <b>Tpm2</b>    | 3.481                          | 7.489   | <b>2.151</b>                              | Mm      | Tropomyosin 2, beta                             |
| <b>Btbd3</b>   | 4.441                          | 9.138   | <b>2.058</b>                              | Mm      | BTB (POZ) domain containing 3                   |
| <b>Ell</b>     | 0.921                          | 1.850   | <b>2.008</b>                              | Mm      | Eleven-nineteen lysine-rich leukemia gene       |
| <b>Creb5</b>   | 1.880                          | 3.355   | <b>1.784</b>                              | Mm      | RIKEN cDNA D430026C09 gene                      |
| <b>Repin1</b>  | 23.258                         | 40.801  | <b>1.754</b>                              | Mm      | Similar to replication initiation region protei |
| <b>Foxj2</b>   | 0.869                          | 1.480   | <b>1.703</b>                              | Mm      | Forkhead box J2                                 |
| <b>Nfatc4</b>  | 5.362                          | 9.023   | <b>1.683</b>                              | Mm      | Nuclear factor of activated T-cells             |
| <b>Glis2</b>   | 0.610                          | 0.973   | <b>1.595</b>                              | Mm      | GLI-Kruppel family member GLI5                  |
| <b>Pbxip1</b>  | 1.245                          | 1.891   | <b>1.519</b>                              | Mm      | Pre-B-cell leukemia transcription factor        |
| <b>Trim68</b>  | 1.720                          | 2.557   | <b>1.487</b>                              | Mm      | RIKEN cDNA F730114J12 gene                      |
| <b>Irx2</b>    | 1.255                          | 1.811   | <b>1.444</b>                              | Mm      | Iroquois related homeobox 2 (Drosophila)        |
| <b>NONO</b>    | 1.062                          | 1.507   | <b>1.419</b>                              | Hs      | Non-POU-domain-containing, octamer-bind         |
| <b>Blank</b>   | 1.070                          | 1.076   | <b>1.006</b>                              | Mm      | Blank Well                                      |

**Supplemental Table 1: Co-Activator TRAP Screen.** HEK293 cells in 364-well plates were individually transfected with one of over 800 transcription-factor-Gal4 (TF-Gal4) fusion proteins in the presence of PC1-CTT or PC1-CTTΔNLS (deleted nuclear-localization sequence), as a negative control. The results are listed by fold-change in TF-Gal4 signal presented as the ratio of PC1-CTT/PC1-CTTΔNLS, in descending order of those transcription factors that showed the most stimulation by PC1-CTT, filtered by relevance.
